# Supplementary material for: Joint toxic effects of polystyrene nanoparticles and organochlorine pesticides (chlordane and hexachlorocyclohexane) on Caenorhabditis elegans
Source: Royal Society of Chemistry journal article supplement (doi:10.1039/d0en00654h), 2020-01-01
Supplement: d0en00654h1.pdf [file d0en00654h1.pdf]

## Electronic Supplementary Information

### Joint toxic effects of polystyrene nanoparticles and organochlorine pesticides (chlordane and hexachlorocyclohexane) on *Caenorhabditis elegans*

Xinyu Li<sup>a</sup>, Jiani Hu<sup>a</sup>, Rong Qiu<sup>a</sup>, Xiaoting Zhang<sup>a</sup>, Yingxin Chen<sup>a</sup>, Defu He<sup>a,b\*</sup>

<sup>a</sup>School of Ecological and Environmental Sciences, East China Normal University, Shanghai, 200241, China;

<sup>b</sup>Shanghai Engineering Research Center of Biotransformation of Organic Solid Waste, East China Normal University, Shanghai, 200241, China

<sup>c</sup>Shanghai Key Laboratory for Urban Ecological Processes and Eco-Restoration, East China Normal University, Shanghai, 200241, China;

\* Corresponding author: Defu He (e-mail: [dfhe@des.ecnu.edu.cn](mailto:dfhe@des.ecnu.edu.cn))

#### Supplementary Information includes 1 figure and 3 tables:

**Fig. S1.** Characterization of polystyrene nanoplastics in the exposure media over time by a fluorescence microscope.

*Page S2*

**Table. S1.** Total concentration of OCPs in exposed solutions.

*Page S3*

**Table. S2.** Statistical results of chlordane or/and PS nanoparticles influencing the expression of *gst-4::GFP* in CL2166 *C. elegans*.

*Page S4*

**Table. S3.** Statistical results of HCH or/and PS nanoparticles influencing the expression of *gst-4::GFP* in CL2166 *C. elegans*.

*Page S4*

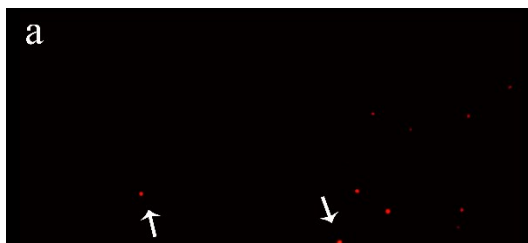

Fig. S1. Distribution of polystyrene nanoplastics in the exposure media. Images of nanoplastics (red fluorescence) in the exposure media at 0 h (a), 24 h (b) and 48 h (c) under simulative exposure condition ( $1.0 \text{ mg L}^{-1}$  PS nanoplastics), respectively. White arrows are pointing to some of fluorescence-labeled NPs. Bar =  $10 \text{ }\mu\text{m}$ .

Table. S1. Nominal and actual concentrations of OCPs in single and joint exposure solutions ( $\text{mg L}^{-1}$ ).

| Nominal concentration | Actual concentration |                 |                 |                  |
|-----------------------|----------------------|-----------------|-----------------|------------------|
|                       | Chlordane            |                 | HCH             |                  |
|                       | Single               | Joint           | Single          | Joint            |
| 0.1                   | $0.06 \pm 0.01$      | $0.13 \pm 0.02$ | $0.07 \pm 0.01$ | $0.09 \pm 0.01$  |
| 0.5                   | $0.31 \pm 0.08$      | $0.42 \pm 0.07$ | $0.31 \pm 0.10$ | $0.35 \pm 0.04$  |
| 1.0                   | $0.76 \pm 0.04$      | $0.91 \pm 0.11$ | $0.66 \pm 0.03$ | $0.76 \pm 0.03$  |
| 5.0                   | $3.81 \pm 0.78$      | $4.81 \pm 0.17$ | $3.46 \pm 0.01$ | $4.30 \pm 0.02$  |
| 10.0                  | $8.10 \pm 0.26$      | $9.35 \pm 0.33$ | $9.81 \pm 0.99$ | $10.13 \pm 0.06$ |

Data: mean  $\pm$  SE, n=3

Table S2 Statistical results of chlordane or/and PS nanoparticles influencing the expression of *gst-4::GFP* in CL2166 *C. elegans* (*p* value, compared by t-test).

| Groups                            |     | 2 <sup>nd</sup> d |        | 4 <sup>th</sup> d |        | 6 <sup>th</sup> d |        |
|-----------------------------------|-----|-------------------|--------|-------------------|--------|-------------------|--------|
|                                   |     | Cont.             | PS NP  | Cont.             | PS NP  | Cont.             | PS NP  |
| PS NP                             |     | 0.9924            | /      | 0.3233            | /      | 0.1674            | /      |
| Chl (mg L <sup>-1</sup> )         | 0.1 | 0.9997            | /      | 0.8877            | /      | 0.2872            | /      |
|                                   | 0.5 | 0.0076            | /      | 0.0010            | /      | 0.0009            | /      |
|                                   | 1.0 | 0.0001            | /      | 0.0001            | /      | 0.0001            | /      |
| (PS NP)-Chl (mg L <sup>-1</sup> ) | 0.1 | 0.8017            | 0.8416 | 0.1863            | 0.9885 | 0.0001            | 0.0058 |
|                                   | 0.5 | 0.0523            | 0.0307 | 0.0001            | 0.0471 | 0.0001            | 0.0004 |
|                                   | 1.0 | 0.0006            | 0.0001 | 0.0001            | 0.0001 | 0.0001            | 0.0001 |

Table S3 Statistical results of HCH or/and PS nanoparticles influencing the expression of *gst-4::GFP* in CL2166 *C. elegans* (*p* value, compared by t-test)

| Groups                            |     | 2 <sup>nd</sup> d |        | 4 <sup>th</sup> d |        | 6 <sup>th</sup> d |        |
|-----------------------------------|-----|-------------------|--------|-------------------|--------|-------------------|--------|
|                                   |     | Cont.             | PS NP  | Cont.             | PS NP  | Cont.             | PS NP  |
| PS NP                             |     | 0.9918            | /      | 0.5264            | /      | 0.5356            | /      |
| HCH (mg L <sup>-1</sup> )         | 0.1 | 0.0962            | /      | 0.0514            | /      | 0.1063            | /      |
|                                   | 0.5 | 0.0034            | /      | 0.0056            | /      | 0.0110            | /      |
|                                   | 1.0 | 0.0001            | /      | 0.0001            | /      | 0.0002            | /      |
| (PS NP)-HCH (mg L <sup>-1</sup> ) | 0.1 | 0.9378            | 0.9896 | 0.2205            | 0.9233 | 0.0473            | 0.5005 |
|                                   | 0.5 | 0.2028            | 0.3697 | 0.0072            | 0.1900 | 0.0092            | 0.2031 |
|                                   | 1.0 | 0.0040            | 0.0189 | 0.0001            | 0.0017 | 0.0001            | 0.0001 |
